1 Experimental Evolution Across Different Thermal Regimes Yields Genetic Divergence in  
2 Recombination Fraction But No Divergence in Temperature-Associated Plastic  
3 Recombination  
4

5  
6 Kathryn P. Kohl<sup>1</sup> and Nadia D. Singh<sup>2</sup> \*

7  
8 <sup>1</sup>Department of Biology, Winthrop University

9 <sup>2</sup>Department of Biology, University of Oregon

10  
11 \*To whom correspondence should be addressed: Department of Biology, University of  
12 Oregon, 5289 University of Oregon, Eugene OR 97403; nsingh@uoregon.edu  
13

14  
15 Running Head: Experimental evolution and recombination in *Drosophila*

16  
17 Keywords: Recombination, phenotypic plasticity, experimental evolution, variable  
18 environment  
19

20 Data archiving: These data will be submitted to Dryad upon the publication of this  
21 manuscript.  
22

23  
24  
25  
26  
27  
28  
29  
30  
31  
32  
33  
34  
35  
36  
37  
38  
39  
40  
41  
42

**Abstract**

Phenotypic plasticity is pervasive in nature. One mechanism underlying the evolution and maintenance of such plasticity is environmental heterogeneity. Indeed, theory indicates that both spatial and temporal variation in the environment should favor the evolution of phenotypic plasticity under a variety of conditions. Cyclical environmental conditions have also been shown to yield evolved increases in recombination frequency. Here we use a panel of replicated experimental evolution populations of *D. melanogaster* to test whether variable environments favor enhanced plasticity in recombination rate and/or increased recombination rate in response to temperature. In contrast to expectation, we find no evidence for either enhanced plasticity in recombination or increased rates of recombination in the variable environment lines. Our data confirm a role of temperature in mediating recombination fraction in *D. melanogaster*, and indicate that recombination is genetically and plastically depressed under lower temperatures. Our data further suggest that the genetic architectures underlying plastic recombination and population-level variation in recombination rate are likely to be distinct.

## 43 **Introduction**

44 From seasonal color variation in butterflies (e.g. Hazel 2002) to nutrient-dependent horn  
45 dimorphism in dung beetles (e.g. Emlen 1994), phenotypic plasticity abounds in nature.  
46 Though there is little debate regarding its ubiquity and its central role in generating  
47 phenotypic diversity, what remains unresolved is twofold: the role of phenotypic  
48 plasticity in evolution and how phenotypic plasticity itself evolves (Via et al. 1995; West-  
49 Eberhard 2003; de Jong 2005; Pfennig et al. 2010). The genetic and molecular  
50 mechanisms mediating phenotypic plasticity lie at the heart of these debates and yet  
51 are largely unknown. For instance, it remains controversial whether there are  
52 independent 'plasticity' genes or whether plasticity in a trait is governed by the same  
53 genes that underlie population-level variation in that trait (for review see Sarkar 2004).  
54 Much work is thus required to determine the genetic and molecular underpinnings of  
55 phenotypic plasticity. However, an understanding of the genetic architecture and  
56 molecular basis of phenotypic plasticity is clearly necessary for modeling the evolution  
57 of phenotypic plasticity and for determining how phenotypic plasticity may contribute to  
58 evolutionary diversification, speciation, and adaptation.

59  
60 A model trait to address these fundamental questions regarding the genetic architecture  
61 of plasticity would satisfy two requirements. One, that trait must exhibit phenotypic  
62 plasticity in response to environmental or developmental conditions. Two, that trait  
63 would vary genetically as well, which would enable disentangling the genetic basis of  
64 population-level variation in the trait from the genetic basis of phenotypic plasticity in

65 that trait. Meiotic recombination rate meets both of these requirements, making it an  
66 ideal trait for investigating the genetic basis of phenotypic plasticity.

67

68 Meiotic recombination rate is a prototypical example of a trait capable of phenotypic  
69 plasticity in many taxa. For instance, social stress has been associated with increased  
70 recombination rates in mice (Belyaev and Borodin 1982), and temperature is known to  
71 affect rates of crossing-over in *Drosophila* (Plough 1917, 1921; Stern 1926; Smith 1936;  
72 Grushko et al. 1991). Similarly, exposure to parasites has been associated with  
73 elevated recombination rates (Andronic 2012; Singh et al. 2015), and nutrient stress is  
74 associated with increased recombination rates in yeast (Abdullah and Borts 2001) and  
75 *Drosophila* (Neel 1941). Further, a clear link between maternal age and recombination  
76 rate has been found in humans (e.g. Kong et al. 2004; Hussin et al. 2011), mice  
77 (Henderson and Edwards 1968; Luthardt et al. 1973) and *Drosophila* (Stern 1926;  
78 Bridges 1927; Redfield 1964; Lake 1984; Chadov et al. 2000; Priest et al. 2007;  
79 Tedman-Aucoin and Agrawal 2012; Hunter et al. 2016b). Thus, meiotic recombination  
80 rate shows variability in the context of organismal development and across  
81 environments, making it a model trait for exploring the evolution of and genetic  
82 architecture of phenotypic plasticity.

83

84 Meiotic recombination rate itself is also genetically variable in a variety of systems  
85 including *Drosophila* (e.g. Brooks and Marks 1986; Hunter et al. 2016a), humans (e.g.  
86 Fledel-Alon et al. 2011), mice (e.g. Dumont et al. 2009), and other mammals (e.g.  
87 Sandor et al. 2012; Ma et al. 2015; Johnston et al. 2016). In mammals, several genes

88 have been identified that have been consistently linked to population-level variation in  
89 recombination rate in multiple species (Kong et al. 2008; Chowdhury et al. 2009; Hinch  
90 et al. 2011; Sandor et al. 2012; Capilla et al. 2014; Johnston et al. 2016). The genetic  
91 architecture of recombination rate in *Drosophila* appears to be distinct, however (Hunter  
92 et al. 2016a), and population-level variation in *D. melanogaster* appears to be governed  
93 by a large number of loci each of which has a small effect on recombination.

94

95 Here we exploit an experimental evolution framework to explore the genetics and  
96 evolution of recombination and plastic recombination in *D. melanogaster*. Specifically,  
97 we used a panel of replicated experimental evolution populations of *D. melanogaster*  
98 (Yeaman et al. 2010). These populations were evolved in either a constant environment  
99 (16°C or 25°C) or in a fluctuating environment in which individuals were alternated  
100 between 16°C and 25°C every generation. Because recombination is sensitive to  
101 temperature in *Drosophila*, we leveraged this panel to determine how recombination  
102 rate and plastic recombination evolve in response to these experimental regimes.

103

104 To generate hypotheses that can be tested within this experimental evolution context,  
105 we consider the theoretical framework surrounding the evolution of plastic  
106 recombination and the evolution of increased recombination. What conditions favor the  
107 evolution of plastic recombination? Theory has shown quite clearly that plastic  
108 recombination readily evolves in haploid systems if recombination is fitness-dependent  
109 (Hadany and Beker 2003). That is, modifiers that facilitate recombination in poor quality  
110 individuals but prevent recombination in high quality individuals can successfully invade

111 populations under a large range of conditions. Fitness-dependent recombination is thus  
112 a solution through which the benefits of recombination (bringing together favorable  
113 combinations of alleles) can be realized without suffering the consequences of  
114 recombination (breaking apart favorable combinations of alleles). However, fitness-  
115 associated recombination evolves less readily in diploids (Agrawal et al. 2005), at least  
116 as a consequence of the direct effects of the recombination modifier (Agrawal et al.  
117 2005; Rybnikov et al. 2017). However, fitness associated recombination may evolve in  
118 diploids as a consequence of selection on average recombination rate if there is cis-  
119 trans epistasis or if there are maternal effects on fitness (Agrawal et al. 2005).  
120 Moreover, recent work has showed that in a cyclical, two state-environment, condition-  
121 dependent recombination strategies are favored over constant recombination strategies  
122 in a diversity of circumstances, as a consequence of both direct and indirect effects of  
123 the plastic modifier (Rybnikov et al. 2017).

124  
125 With respect to the evolution of recombination, theory predicts that in a diploid system,  
126 modifiers that increase recombination may invade populations under certain conditions.  
127 If recombination is favored because it heightens the efficacy of directional selection,  
128 then increased recombination can evolve if epistasis is weak and negative (Barton  
129 1995; Otto and Michalakis 1998). Increased recombination can also evolve in fluctuating  
130 environments, wherein combinations of alleles that are beneficial in the current  
131 environment become deleterious in a future environment (Charlesworth 1976; Otto and  
132 Michalakis 1998; Dapper and Payseur 2017). However, the periodicity of environmental  
133 change is a critical determinant of the evolutionary trajectory of recombination rate

134 modifiers. If the sign of linkage disequilibrium varies cyclically and the period of  
135 fluctuations is greater than two, then increased recombination may evolve  
136 (Charlesworth 1976; Carja et al. 2014). Environmental fluctuations that occur over  
137 longer time scales have similar evolutionary dynamics to the directional selection  
138 scenario, in which weak negative epistasis between alleles favored in the current  
139 environment is required for the evolution of increased recombination (Barton 1995; Otto  
140 and Michalakis 1998).

141

142 Theory thus predicts that cyclical environments can affect both the evolution of  
143 recombination and the evolution of plastic recombination. Given that cyclical two-state  
144 environments favor condition-dependent recombination over constant recombination,  
145 we hypothesized that the populations in the variable thermal regime would evolve a  
146 greater magnitude in temperature-associated plastic recombination relative to those  
147 populations evolving under a constant temperature. We further hypothesized that flies in  
148 our fluctuating environment experimental regime would evolve increased overall rates of  
149 recombination relative to their counterparts evolving under constant temperature  
150 conditions. In contrast to this expectation, we find no evidence for increased plastic  
151 recombination in the fluctuating environment selection lines. In addition, our prediction  
152 of increased recombination in the fluctuating temperature regime is not borne out by our  
153 data; these populations instead exhibit recombination rates intermediate between the  
154 two constant-temperature evolved populations. Our data also confirm a role of  
155 temperature in mediating recombination fraction in *D. melanogaster*. Interestingly, our  
156 data indicate that recombination is genetically and plastically depressed under lower

157 temperatures, independent of experimental evolution treatment. We find significant  
158 differences in recombination frequency between the two constant temperature  
159 treatments at both experimental temperatures, indicating that recombination rate has  
160 evolved over the course of the experimental evolution regime through direct or indirect  
161 selection. These observations collectively suggest that the genetic basis of plastic  
162 recombination is independent from the genetic basis of population-level variation in  
163 recombination fraction.

164

## 165 **Materials and Methods**

### 166 *Experimentally evolved populations*

167 The experimentally evolved populations used in the present study were generated  
168 previously and are described in detail elsewhere (Yeaman et al. 2010; Cooper et al.  
169 2012; Condon et al. 2014). Briefly, wild-caught *Drosophila melanogaster* females from  
170 British Columbia were used to establish 298 isofemale lines. Progeny from these  
171 isofemales lines were used to establish a large breeding population that was allowed to  
172 grow for six generations. This breeding population ultimately reached a population size  
173 of ~64,000 adults. This population was maintained for nine generations and was  
174 subsequently used to found the experimental evolution populations.

175

176 There were five replicate populations for each of three experimental treatments: 1) 16°  
177 C constant (C regime), 2) 25° C constant (H regime) and 3) a fluctuating thermal regime  
178 in which the flies were alternated between 16° and 25° C every four weeks (T regime).  
179 Generation time varied among treatments; a new generation was established at 2-week



180 intervals for flies at 25° C and at 4-week intervals for flies at 16° C. These selective  
181 environments were maintained for over three years for a total of 32 generations at 16°  
182 C, 64 generations at 25° C, and an intermediate number of generations for the thermally  
183 variable experimental evolution regime.

184

185 Following this experimental evolution, genotypes were sampled from each of the five  
186 replicate populations for each of the three experimental treatments. For two consecutive  
187 generations, a single virgin female was mated to a single virgin male to establish an  
188 isofemale line. Multiple isofemale lines were established for each of the replicate  
189 populations through two generations of brother-sister mating. These lines were then  
190 transferred every three weeks for 27 months under controlled conditions. The goals of  
191 establishing isofemale lines were to isogenize the genome within each line and to  
192 minimize further evolution in the laboratory.

193

194 Brandon Cooper generously provided these lines to us in 2012. We maintained these  
195 lines in a 12 hour:12 hour light:dark cycle on a standardized cornmeal-yeast-molasses  
196 medium. Adult flies were placed at 16° C and 25° C for experimentation, and offspring of  
197 these flies were collected for use in the first cross (described below).

198

### 199 *Estimating recombination*

200 To assay recombination rate, we took advantage of visible, recessive markers in *D.*  
201 *melanogaster*. To measure recombination rates on the 3R chromosome, we used a  
202 strain marked with *ebony* ( $e^4$ ) and *rough* ( $ro^1$ ); these markers are 20.4 cM apart

203 (Lindsley and Grell 1967). These markers have been used extensively in our lab to  
204 estimate recombination frequency (Jackson et al. 2015; Singh et al. 2015; Hunter et al.  
205 2016a; Hunter et al. 2016b).

206  
207 To assay recombination rate variation in the experimental evolution lines, we used a  
208 classic two-step backcrossing scheme. All crosses were executed at either 25° C or 16°  
209 C with a 12:12 hour light:dark cycle on standard media using virgin females aged  
210 roughly 24 hours. We conducted 1-9 (average 4.5) replicate assays for each line at  
211 each temperature. The number of lines assayed from each population at each  
212 temperature is presented in Table 1. For the first cross, ten virgin females from each  
213 experimental evolution line were crossed to ten *e ro* males in vials. Males and females  
214 were allowed to mate for five days, after which all adults were cleared from the vials. F<sub>1</sub>  
215 females resulting from this cross are doubly heterozygous; these females are the  
216 individuals in which recombination is occurring. To uncover these recombination events  
217 we backcross F<sub>1</sub> females to doubly-marked males. For this second cross, ten  
218 heterozygous virgin females were collected and backcrossed to ten doubly-marked  
219 males. Males and females were allowed to mate for five days, after which all adults  
220 were cleared from the vials. After eighteen days, BC<sub>1</sub> progeny were collected and  
221 scored for sex and for visible phenotypes. Recombinant progeny were then identified as  
222 having only one visible marker (*e+* or *+ro*). For each replicate, recombination rates were  
223 estimated by taking the ratio of recombinant progeny to the total number of progeny.  
224 Double crossovers cannot be recovered with this assay, so our estimates of  
225 recombination frequency are likely to be biased downwards slightly.

226

227 *Statistical analyses*

228 All statistics were conducted using JMPPro v13.0. We used a generalized linear model

229 with a binomial distribution and logit link function on the proportion of progeny that is

230 recombinant. We treated each offspring as a realization of a binomial process (either

231 recombinant or nonrecombinant), summarized the data for a given vial by the number of

232 recombinants and the number of trials (total number of progeny per vial), and tested for

233 an effect of line, temperature, replicate population, and experimental evolution regime.

234 The lines that had missing data at one of the two temperatures were excluded from the

235 analysis. Note that replicate population is nested within experimental evolution regime

236 and line is nested within replicate population. The full model is as follows:

237

$$238 \quad Y_{ij} = \mu + L_i + T_j + R_k + E_l + TxE + \varepsilon$$

239

$$240 \quad \text{for: } i = 1 \dots 145, j = 1 \dots 2, k = 1 \dots 5, l = 1 \dots 3,$$

241  $Y$  represents the proportion of progeny that is recombinant,  $\mu$  represents the mean of

242 regression, and  $\varepsilon$  represents the error.  $L$  denotes strain,  $T$  denotes temperature,  $R$

243 indicates the replicate population,  $E$  represents the experimental evolution regime, and

244  $TxE$  denotes the interaction of temperature and experimental evolution regime. All of

245 these are modeled as fixed effects.

246

247 We also tested specifically for genetic variation in recombination plasticity using a

248 similar statistical approach. We estimated recombination plasticity as the change in

249 recombination fraction between pairs of replicates at 25 and 16 degrees C, where each  
250 member of the pair was randomly chosen (without replacement) from the total number  
251 of replicates of that line surveyed at that temperature. If the line had differing numbers  
252 of replicates measured at each temperature, the number of replicate pairs used to  
253 estimate the change in recombination was limited by the temperature at which fewer  
254 replicates were assayed. The extra replicates at the other temperature were not  
255 included in the analysis. We tested for an effect of line, replicate population, and  
256 experimental evolution regime, where replicate population is nested within experimental  
257 evolution regime and line is nested within replicate population. The full model is as  
258 follows:

259

$$260 \quad Y_{ij} = \mu + L_i + R_k + E_l + + \varepsilon$$

261

$$262 \quad \text{for: } i = 1 \dots 145, k = 1 \dots 5, l = 1 \dots 3,$$

263  $Y$  represents the change in recombination fraction ( $RF_{25} - RF_{16}$ ),  $\mu$  represents the mean  
264 of regression, and  $\varepsilon$  represents the error.  $L$  denotes strain,  $R$  indicates the replicate  
265 population and  $E$  represents the experimental evolution regime. All of these are  
266 modeled as fixed effects.

267

268 Finally, we tested for an effect of temperature on the potential viability effects  
269 associated with the doubly marked chromosome. We used a generalized linear model  
270 with a binomial distribution and logit link function on the proportion of progeny that is  
271 recombinant. We treated each non-recombinant offspring as a realization of a binomial

272 process (either wild-type or *e ro*), summarized the data for a given vial by the number of  
273 wild-type flies and the number of trials (total number of non-recombinant progeny per  
274 vial), and tested for an effect of line, temperature, replicate population, and experimental  
275 evolution regime. Note that replicate population is nested within experimental evolution  
276 regime and line is nested within replicate population. The full model is as follows:

277

$$278 \quad Y_{ij} = \mu + L_i + T_j + R_k + E_l + TxE + \varepsilon$$

279

$$280 \quad \text{for: } i = 1 \dots 145, j = 1 \dots 2, k = 1 \dots 5, l = 1 \dots 3,$$

281  $Y$  represents the proportion of non-recombinant progeny that is wild-type,  $\mu$  represents  
282 the mean of regression, and  $\varepsilon$  represents the error.  $L$  denotes strain,  $T$  denotes  
283 temperature,  $R$  indicates the replicate population,  $E$  represents the experimental  
284 evolution regime, and  $TxE$  denotes the interaction of temperature and experimental  
285 evolution regime. All of these are modeled as fixed effects.

286

287

## 288 **Results**

### 289 *Robustness of recombination fraction estimation*

290 In total, 149,326 progeny were collected from the experimental crosses and scored for  
291 recombinant phenotypes. A total of 65,340 of those progeny resulted from crosses at  
292 16°C while the remaining 83,986 flies resulted from crosses at 25°C. The number of  
293 progeny per replicate vial ranged from 10-247, with a mean of 92 progeny per replicate  
294 vial at 16°C and 118 flies per vial at 25°C.

295

296 To test for deviations from expected ratios of phenotype classes, we performed G-tests  
297 for goodness of fit for all crosses for the following ratios: males versus females, wild-  
298 type flies versus *e ro* flies and finally, *e +* flies versus *+ ro* flies. The null hypothesis for  
299 each comparison is a 1:1 ratio of phenotype classes. For each of the crosses, we  
300 summed progeny counts across all replicates of that cross.

301 Comparing total females to total males, 16 of 317 (5%) lines show significant deviations  
302 from the expected 1:1 ratio ( $P < 0.05$ , G-test). A relative excess of females is observed  
303 in 14 of 16 of those lines. The female-biased lines show M/F ratios ranging from 0.21-  
304 0.71, with an average of 0.58 and a median of 0.62, indicating an approximately  
305 symmetrical distribution. Of the 16 lines, nine show a bias at 16 degrees, and seven  
306 show a bias at 25 degrees. None of the lines show a significant bias at both  
307 temperatures. One of these deviations remains significant after using a Bonferroni-  
308 correction for multiple tests (Bonferroni-corrected  $P = 0.02$ , G-test). While the Bonferroni  
309 correction is very conservative, we further note that the number of significant tests we  
310 observe is not outside the 95<sup>th</sup> percentile of a binomial distribution with  $P = 0.05$ ; with  
311 this  $P$ -value we expect to see 22 significant tests and we only observe 16.

312 With respect to wild-type versus *e ro* flies, 30 of 317 (9%, slightly above the 22 tests  
313 expected to be positive given binomial sampling) lines show a significant deviation from  
314 the expected 1:1 ratio ( $P < 0.05$ , G-test), and in all but five of these cases these crosses  
315 yield a relative excess of wild-type flies. The ratio of wild-type to double mutant in those  
316 wild-type biased lines ranges from 1.4-3.8, with an average of 2.0. This is consistent  
317 with a mild viability defect associated with the visible markers. Eight of the 30 strains

318 showing deviations exhibit this skew at 16 degrees, with the remaining 22 showing  
319 deviations at 25 degrees. After correcting for multiple testing, three H lines maintain a  
320 significant deviation from the 1:1 ratio of phenotype classes (Bonferroni-corrected  $P <$   
321 0.0005, G-test).

322 Finally, 19 of 317 (6%, fewer than the 22 positive tests given with binomial sampling)  
323 lines show significantly different numbers of  $e +$  flies versus  $+ ro$  flies ( $P < 0.05$ , G-test),  
324 with 13 of those 19 lines showing an excess of  $+ ro$  flies. The mean and median  $e +/+ ro$   
325 ratio for these 13 lines are 0.34 and 0.35, respectively. Nine of the 19 skewed lines  
326 show a skew at 16 degrees while 10 show a skew at 25 degrees. None of these  
327 deviations remain significant after using a Bonferroni-correction for multiple tests.

328 Although the number of lines with significant deviations from null expectation is quite  
329 small relative to the total number of lines, especially in the context of binomial sampling,  
330 our data are nonetheless indicative of a mild viability defect associated with our marked  
331 chromosome. However, these skewed ratios do not appear to depend on temperature  
332 as is evidenced by the observation that skewed ratios were observed nearly equally  
333 between the two experimental temperatures. Moreover, fitting a generalized linear  
334 model with a binomial distribution and logit link function on the proportion of non-  
335 recombinant progeny that is wild-type shows no significant effect of temperature ( $P =$   
336 0.07,  $\chi^2$  test). We thus believe that whatever small viability defects are associated with  
337 the doubly marked chromosome are not systematically biasing the estimates of  
338 recombination in this experiment.

339 *Factors affecting recombination fraction*

340 To identify the factors contributing to the observed variation in the recombination  
341 fraction in the current experiment, we used a logistic regression model. We were  
342 particularly interested in the effects of genotype, developmental temperature, selection  
343 regime, replicate population, and the interaction between selection regime and  
344 temperature. Note that because we are assaying recombination in heterozygous  
345 females (see Materials and Methods), we can only detect dominant genetic effects.  
346 Consistent with expectation, temperature significantly affects recombination fraction ( $P$   
347 = 0.02,  $\chi^2$  test; Figure 1, Table 2). In all three experimental evolution regimes, the  
348 proportion of offspring produced that is recombinant is higher at 25°C than it is at 16°C,  
349 though this increase is not statistically significant ( $P > 0.13$ , all comparisons, Wilcoxon  
350 Rank Sum Test). Thus, phenotypic plasticity in recombination fraction associated with  
351 temperature is observed across all three selective environments, though the magnitude  
352 of the effect is small.

353 Although the capacity for phenotypic plasticity is observed consistently across the three  
354 experimental evolution scenarios, these scenarios have yielded genetic divergence in  
355 recombination fraction independent of near-term rearing temperature. Specifically, the  
356 selective regime significantly contributes to the observed variation in recombination  
357 fraction among lines ( $P < 0.0001$ ,  $\chi^2$  test; Figure 1, Table 2). The H lines show the  
358 highest recombination fraction at both temperatures, the C lines show the lowest  
359 recombination fraction at both temperatures, and the T lines show intermediate values of  
360 recombination fraction at both temperatures. For flies raised at 16°C, the recombination  
361 fraction of H lines is significantly higher than that of C lines ( $P < 0.0001$ , Tukey's HSD).  
362 For flies reared at 25°C, the recombination fraction of both H and T lines is significantly



363 increased relative to the C lines ( $P < 0.03$ , both comparisons, Tukey's HSD).

364 Other factors in the model that significantly contribute to the observed variation in  
365 recombination rate are genotype and population ( $P < 0.0001$ , both factors  $\chi^2$  test; Figure  
366 1, Table 2). This indicates that genetic differences among lines, even within populations  
367 and selective regimes, also contribute to phenotypic variation in recombination fraction.  
368 A significant effect of population indicates that replicates differ in their responses to the  
369 selective environment. This could be driven by random genetic drift over the course of  
370 the experimental evolution, or differences in the genetic variants present among  
371 replicates at their founding.

372 Experimentally-evolved populations do not differ in their degree of phenotypic plasticity  
373 in recombination fraction in response to temperature. That is, we find no significant  
374 interaction effect between 'regime' and temperature ( $P = 0.90$ ,  $\chi^2$  test; Figure 1, Table 2).  
375 This indicates that there is no significant differentiation among selective treatments with  
376 respect to how recombination fraction changes in response to temperature. Indeed, the  
377 magnitude of the change in recombination fraction between 25°C and 16°C is consistent  
378 across the selective treatments (Figure 2).

379 To test whether there was genetic variation for recombination plasticity among lines, we  
380 also fit a model in which the response variable was the difference in recombination  
381 fraction between 25°C and 16°C. Our model indicates that there are no significant  
382 differences in the degree of plastic recombination among lines, populations, or  
383 experimental evolution regimes ( $P > 0.16$ , all comparisons; Table 3).

384

## 385 Discussion

### 386 *Temperature-associated plastic recombination*

387 Phenotypic plasticity in recombination rate has been observed in a variety of taxa.  
388 Temperature in particular has been shown to affect the frequency of recombination in  
389 several species including *Drosophila* (Plough 1917, 1921; Smith 1936; Grell 1978),  
390 yeast (Johnston and Mortimer 1967), worms (Rose and Baillie 1979) and fungi  
391 (McNelly-Ingles et al. 1966; Rifaat 1969; Lu 1974). Our results confirm phenotypic  
392 plasticity in recombination fraction in response to temperature in *D. melanogaster*. It has  
393 been previously shown that recombination increases when flies are raised at  
394 temperatures higher or lower than their optimal temperature (Plough 1917, 1921; Smith  
395 1936; Grell 1978). However, our data indicate that recombination fraction is lower at  
396 16°C than it is than 25°C independent of the selective environment in which the flies  
397 were evolved. If one imagines that each population adapted to the temperature at which  
398 it was raised during the experimental evolution experiment, and departures from that  
399 optimal temperature would increase recombination as was seen before (Plough 1917,  
400 1921; Smith 1936; Grell 1978), then one might have expected that in our study we  
401 would have found that the H lines would have higher recombination at 16°C than at  
402 25°C, and vice-versa for the C lines. The overall reduction in recombination frequency  
403 at the lower versus the higher temperature in the current experiment is instead  
404 reminiscent of what is seen in *C. elegans*, where recombination frequency directly  
405 scales with temperature (Rose and Baillie 1979). A reduction in crossover frequency  
406 with decreased temperature has also been seen in yeast and *Neurospora* (Rifaat 1969),  
407 though *Neurospora* also shows evidence of increased recombination at lower

408 temperatures (e.g. McNelly-Ingles et al. 1966).

409 At least two explanations for the varied recombinational responses to temperature  
410 within species and across experiments can be offered. First, genetic background clearly  
411 mediates recombination fraction, and different strains have been utilized across  
412 experiments. Genetic variation for recombination rate is clear not only in *D.*  
413 *melanogaster* (Broadhead et al. 1977; Brooks and Marks 1986; Hunter and Singh 2014;  
414 Hunter et al. 2016a), but also in many other species including mice, sheep, humans,  
415 and worms (e.g. Dumont et al. 2009; Rockman and Kruglyak 2009; Kong et al. 2010;  
416 Johnston et al. 2016). Differences in the genotypes of the strains used for  
417 experimentation may yield variable responses to temperature. Indeed, genotype-  
418 environment interactions significantly contribute to recombination rate variation in *D.*  
419 *melanogaster*, for instance (Hunter et al. 2016b). Second, the magnitude and direction  
420 of temperature-associated plastic recombination may vary across the genome. This is  
421 clearly the case in *Drosophila*, where centromeric regions show an exaggerated  
422 response to temperature (Plough 1921; Stern 1926), for example. The effect of  
423 temperature on recombination frequency is also heterogeneous across the yeast  
424 genome, but not in an obvious association with centromeres (Johnston and Mortimer  
425 1967). Therefore, the differences among studies with regard to temperature-associated  
426 plastic recombination could be driven in part by different intervals of the genome being  
427 surveyed.

428 Why might recombination rates be sensitive to temperature? One possibility, as  
429 described above, is that populations are adapted to specific temperatures and being  
430 reared outside of these temperatures is stressful. Stress has long been associated with

431 changes in recombination frequency (for review see Parsons 1988; Modliszewski and  
432 Copenhaver 2017). Another possibility is that recombination rates vary in response to  
433 temperature because the recombinational machinery is thermosensitive (Morgan et al.  
434 2017). Specifically, if the proteins involved in the synaptonemal complex and axis  
435 formation function differently at different temperatures, then crossover number may vary  
436 according to temperature (Morgan et al. 2017). Note that this hypothesis is not at odds  
437 with the stress-associated recombination hypothesis; selection may shape  
438 thermotolerance of meiotic proteins directly or indirectly, and environments outside of  
439 the range to which individuals have adapted may lead to meiotic dysfunction (Morgan et  
440 al. 2017). If thermotolerance plays a role in temperature-associated recombination, then  
441 we might expect to see different thermostability of the meiotic axis and/or synaptonemal  
442 complex in our C versus H lines, as they have evolved distinct recombination rates.

#### 443 *Genetic variation in recombination*

444 It is well-documented that there is a genetic component to intraspecific variation in  
445 recombination rate. Such variation can be observed in humans, other mammals, plants,  
446 and insects (Shaw 1972; Valentin 1973; Dewees 1975; Hadad et al. 1996; Dumont et al.  
447 2009; Johnston et al. 2016). Genetic variability in and heritability of recombination rate  
448 in *Drosophila* in particular has strong support in the literature. As noted above, classical  
449 genetic experiments indicate that the amount of crossing-over can vary among lines of  
450 *D. melanogaster* (Broadhead et al. 1977; Brooks and Marks 1986), even within a single  
451 population (Hunter et al. 2016a). It is therefore consistent with expectation that our  
452 analysis reveals that phenotypic variation in recombination fraction is explained in part  
453 by differences in genotypes ('line', Table 2).

454 Given that fluctuating environments favor recombination in certain circumstances, one  
455 initial hypothesis was that the variable temperature experimental evolution lines would  
456 evolve a higher baseline recombination rate. This was not observed, though our results  
457 do indicate divergence in recombination rate among the three experimental evolution  
458 regimes. That the T lines did not evolve higher recombination could indicate that  
459 although the environment varied cyclically with period two, the sign of linkage  
460 disequilibrium and/or epistasis did not change with the environmental changes.

461 The significant contribution of selective environment to the observed variation in  
462 recombination fraction in the current experiment suggests that recombination fraction  
463 was subject to different selective pressures in the three different environments. As a  
464 response to these pressures, the H lines evolved (or maintained) a higher  
465 recombination fraction independent of the temperature at which recombination was  
466 measured. C lines, in contrast, evolved a lower recombination fraction, which manifests  
467 at both temperatures. In contrast to our expectation, the T lines exhibit an intermediate  
468 phenotype at both temperatures. That the C lines have a lower recombination fraction  
469 than the H lines at both temperatures and recombination fractions at 16°C are  
470 consistently lower than recombination fractions at 25°C for all lines clearly indicates a  
471 role for temperature in both plastic recombination and baseline recombination rate. It  
472 should be noted that the map distance between the visible markers *ebony* and *rough* is  
473 20.4 cM (Lindsley and Grell 1967), and the average distance between these markers in  
474 112 lines from a North American population of *D. melanogaster* is 20.7 cM (Hunter et al.  
475 2016a). These estimates are similar to the average recombination fraction of the H lines  
476 at 25°C (20.6 cM, Figure 1). This may indicate that the H lines maintained their

477 recombination fraction while the C and T lines evolved a reduced recombination rate,  
478 but this is purely speculative. Were the founding population of these experimental  
479 evolution populations still available, this could be tested empirically.

480 Our data clearly indicate that baseline recombination rate evolves in response to  
481 temperature. We are as yet unaware of any data indicating clinal variation in  
482 recombination frequency among populations of any species, though our data suggest  
483 that there may be temperature-associated variation in this trait. Importantly, the adaptive  
484 significance of the evolved response to temperature observed in the current study  
485 remains unknown. Moreover, it is unknown whether changes in recombination among  
486 experimental treatments result from direct selection on recombination frequency itself or  
487 as an indirect consequence of selection on other traits. Both increases and decreases in  
488 recombination rate have been observed in laboratory selection experiments in which  
489 recombination rate itself was successfully subjected to artificial selection (Chinnici 1971;  
490 Kidwell 1972; Charlesworth and Charlesworth 1985). However, changes in  
491 recombination rate have been also shown to evolve as a correlated response to artificial  
492 selection on other characters (Flexon and Rodell 1982; Zhuchenko et al. 1985; Korol  
493 and Iliadi 1994; Rodell et al. 2004). It may be that the evolved changes in recombination  
494 rate among selection regimes are indirect consequences of natural selection on other  
495 phenotypes that are relevant for the experimental evolution treatments. Indeed, other  
496 studies on these lines have revealed divergence in other traits including body size, cell  
497 size, and metabolism across treatments (Adrian et al. 2016; Alton et al. 2016).

498 While selection appears to be driving recombination rate evolution among experimental  
499 evolution regimes, we cannot discount a role of random genetic drift in the evolution of

500 recombination rate in these lines. Specifically, our data highlights variability in  
501 recombination rate that can be ascribed to replicate population. Thus, the phenotypic  
502 response to selection within a given treatment does vary among replicate populations.  
503 This variation could result from random genetic drift over the course of the experimental  
504 evolution course, or alternatively from stochastic variation in the pool of standing genetic  
505 variation present within each replicate at its founding. Previous work on these lines  
506 showed no effect of drift on the evolution of cell membrane plasticity among treatments  
507 (Cooper et al. 2012). This indicates that if our inter-replicate variability in the response  
508 to selection is indeed due to drift, then the strength of (direct or indirect) selection on  
509 recombination frequency is less intense than the strength of selection on cell membrane  
510 plasticity. Alternatively, if variance in recombination rate is driven by alleles of  
511 intermediate frequency, recombination rate could drift more rapidly than a trait driven by  
512 alleles of low frequency.

513

#### 514 *Genetics of plastic recombination*

515 Theory predicts that fluctuating environments can lead to the evolution of phenotypic  
516 plasticity under certain conditions. We thus hypothesized that the variable temperature  
517 experimental evolution lines would evolve a greater capacity for temperature-associated  
518 plastic recombination. In contrast to that expectation, here we show that while the  
519 capacity for plastic recombination is observed in all three experimental evolution  
520 treatments, the magnitude of temperature-associated plastic recombination is consistent  
521 across selection regimes. That is, there is no significant contribution of the interaction  
522 effect between the selection regime and temperature to observed phenotypic variation

523 in recombination fraction.

524 While we observe no divergence among regimes in the capacity for plastic  
525 recombination, we note that divergence among regimes in phenotypic plasticity has  
526 been observed in other phenotypes. Specifically, T lines show an increased capacity for  
527 plasticity of the lipid composition of the cell membranes relative to the H and C lines  
528 (Cooper et al. 2012). These data illustrate that temporal variation in temperature can  
529 indeed lead to the evolution of increased plasticity in principle. That we see no evolution  
530 of an increased plasticity in recombination in lines subject to a variable thermal regime  
531 could suggest that there is little to no selective advantage of increased plastic  
532 recombination in environments that vary cyclically with respect to temperature  
533 Alternatively, it could be that the costs of greater plasticity in recombination are  
534 sufficiently large as to not be outweighed by the potential benefits of enhanced plastic  
535 recombination in variable environments.

536 When coupled with our observation that the selection treatments did yield divergence in  
537 baseline recombination frequency, our data indicate that the recombination fraction and  
538 temperature-associated plastic recombination have separable genetic architectures.  
539 This bears directly on a long-standing question on the genetic and molecular  
540 underpinnings of phenotypic plasticity. In particular, the extent to which genes  
541 underlying individual traits are the same genes underlying phenotypic plasticity in those  
542 traits remains controversial. Our data indicate that the genetic bases of these traits are  
543 at least partially non-overlapping in the case of recombination fraction in *D.*  
544 *melanogaster* and its response to temperature.



545 **Acknowledgments**

546 The authors gratefully acknowledge Brandon Cooper for providing us with the lines that  
547 were used in the study. Brandon Cooper and Kristi Montooth provided valuable  
548 feedback on the experimental design. The authors also thank Brandon Cooper and  
549 Mohamed Noor for their valuable feedback on and suggestions for the manuscript.  
550 Comments from the associate editor and two anonymous reviewers greatly improved  
551 this manuscript. This work was supported by National Science Foundation grant MCB-  
552 1412813 to N. D. S.

553

554 **Literature Cited**

- 555
- 556 Abdullah, M. F. F. and R. H. Borts. 2001. Meiotic recombination frequencies are  
557 affected by nutritional states in *Saccharomyces cerevisiae*. Proceedings of the  
558 National Academy of Sciences of the United States of America 98:14524-14529.
- 559 Adrian, G. J., M. Czarnoleski, and M. J. Agilletta. 2016. Flies evolved small bodies and  
560 cells at high or fluctuating temperatures. Ecology and Evolution 6:7991-7996.
- 561 Agrawal, A. F., L. Hadany, and S. P. Otto. 2005. The evolution of plastic recombination.  
562 Genetics 171:803-812.
- 563 Alton, L. A., C. Condon, C. R. White, and M. J. Angilletta. 2016. Colder environments  
564 did not select for a faster metabolism during experimental evolution of *Drosophila*  
565 *melanogaster*. Evolution 71:145-152.
- 566 Andronic, L. 2012. Viruses as triggers of DNA rearrangements in host plants. Canadian  
567 Journal of Plant Science 92:1083-1091.
- 568 Barton, N. H. 1995. A General-Model for the Evolution of Recombination. Genet. Res.  
569 65:123-144.
- 570 Belyaev, D. K. and P. M. Borodin. 1982. The Influence of Stress on Variation and Its  
571 Role in Evolution. Biol. Zentralbl. 101:705-714.
- 572 Bridges, C. B. 1927. The relation of the age of the female to crossing over in the third  
573 chromosome of *Drosophila melanogaster*. J. Gen. Physiol. 8:689-700.
- 574 Broadhead, R. S., J. F. Kidwell, and M. G. Kidwell. 1977. Variation of recombination  
575 fraction in *Drosophila melanogaster* females. J. Hered. 68:323-326.
- 576 Brooks, L. D. and R. W. Marks. 1986. The organization of genetic variation for  
577 recombination in *Drosophila melanogaster* Genetics 114:525-547.
- 578 Capilla, L., N. Medarde, A. Alemany-Schmidt, M. Oliver-Bonet, J. Ventura, and A. Ruiz-  
579 Herrera. 2014. Genetic recombination variation in wild Robertsonian mice: on the  
580 role of chromosomal fusions and Prdm9 allelic background. Proceedings of the  
581 Royal Society B-Biological Sciences 281.
- 582 Carja, O., U. Liberman, and M. W. Feldman. 2014. Evolution in changing environments:  
583 Modifiers of mutation, recombination, and migration. Proceedings of the National  
584 Academy of Sciences of the United States of America 111:17935-17940.
- 585 Chadov, B. F., E. V. Chadova, G. N. Anan'ina, S. A. Kopyl, and E. I. Volkova. 2000. Age  
586 changes in crossing over in *Drosophila* are similar to changes resulting from  
587 interchromosomal effects of a chromosome rearrangement on crossing over.  
588 Russ. J. Genet. 36:258-264.
- 589 Charlesworth, B. 1976. Recombination Modification in a Fluctuating Environment.  
590 Genetics 83:181-195.
- 591 Charlesworth, B. and D. Charlesworth. 1985. Genetic Variation in recombination in  
592 *Drosophila* II. Genetic analysis of a high recombination stock. Heredity 54:85-98.
- 593 Chinnici, J. P. 1971. Modification of recombination frequency in *Drosophila* I. Selection  
594 for increased and decreased crossing over. Genetics 69:71-&.
- 595 Chowdhury, R., P. R. J. Bois, E. Feingold, S. L. Sherman, and V. G. Cheung. 2009.  
596 Genetic Analysis of Variation in Human Meiotic Recombination. PLoS Genet. 5.
- 597 Condon, C., B. S. Cooper, S. Yeaman, and M. J. Angilletta. 2014. Temporal Variation  
598 Favors the Evolution of Generalists in Experimental Populations of *Drosophila*  
599 *Melanogaster*. Evolution 68:720-728.

- 600 Cooper, B. S., L. A. Hammad, N. P. Fisher, J. A. Karty, and K. L. Montooth. 2012. In a  
601 variable thermal environment selection favors greater plasticity of cell membranes  
602 in *Drosophila Melanogaster*. *Evolution* 66:1976-1984.
- 603 Dapper, A. L. and B. A. Payseur. 2017. Connecting theory and data to understand  
604 recombination rate evolution. *Philos T R Soc B* 372.
- 605 de Jong, G. 2005. Evolution of phenotypic plasticity: patterns of plasticity and the  
606 emergence of ecotypes. *New Phytol.* 166:101-117.
- 607 Dewees, A. A. 1975. Genetic Modification of Recombination Rate in *Tribolium-*  
608 *Castaneum*. *Genetics* 81:537-552.
- 609 Dumont, B. L., K. W. Broman, and B. A. Payseur. 2009. Variation in Genomic  
610 Recombination Rates Among Heterogeneous Stock Mice. *Genetics* 182:1345-  
611 1349.
- 612 Emlen, D. J. 1994. Environmental-Control of Horn Length Dimorphism in the Beetle  
613 *Onthophagus-Acuminatus* (Coleoptera, Scarabaeidae). *Proceedings of the Royal*  
614 *Society B-Biological Sciences* 256:131-136.
- 615 Fledel-Alon, A., E. M. Leffler, Y. T. Guan, M. Stephens, G. Coop, and M. Przeworski.  
616 2011. Variation in Human Recombination Rates and Its Genetic Determinants.  
617 *Plos One* 6.
- 618 Flexon, P. B. and C. F. Rodell. 1982. Genetic recombination and directional selection  
619 for DDT resistance in *Drosophila melanogaster* *Nature* 298:672-674.
- 620 Grell, R. F. 1978. Comparison of Heat and Inter-Chromosomal Effects on  
621 Recombination and Interference in *Drosophila-Melanogaster*. *Genetics* 89:65-77.
- 622 Grushko, T. A., S. E. Korochkina, and V. V. Klimenko. 1991. Temperature-dependent  
623 control of crossing-over frequency in *Drosophila melanogaster*: The impact upon  
624 recombination frequency of infraoptimal and superoptimal shock temperatures in  
625 the course of early ontogeny *Genetika* 27:1714-1721.
- 626 Hadad, R. G., T. W. Pfeiffer, and C. G. Poneleit. 1996. Repeatability and heritability of  
627 divergent recombination frequencies in the Iowa Stiff Stalk Synthetic (*Zea mays*  
628 L). *Theor. Appl. Genet.* 93:990-996.
- 629 Hadany, L. and T. Beker. 2003. On the evolutionary advantage of fitness-associated  
630 recombination. *Genetics* 165:2167-2179.
- 631 Hazel, W. N. 2002. The environmental and genetic control of seasonal polyphenism in  
632 larval color and its adaptive significance in a swallowtail butterfly. *Evolution*  
633 56:342-348.
- 634 Henderson, S. A. and R. G. Edwards. 1968. Chiasma frequency and maternal age in  
635 mammals. *Nature* 218:22-28.
- 636 Hinch, A. G., A. Tandon, N. Patterson, Y. L. Song, N. Rohland, C. D. Palmer, G. K.  
637 Chen, K. Wang, S. G. Buxbaum, E. L. Akylbekova, M. C. Aldrich, C. B.  
638 Ambrosone, C. Amos, E. V. Bandera, S. I. Berndt, L. Bernstein, W. J. Blot, C. H.  
639 Bock, E. Boerwinkle, Q. Y. Cai, N. Caporaso, G. Casey, L. A. Cupples, S. L.  
640 Deming, W. R. Diver, J. Divers, M. Fornage, E. M. Gillanders, J. Glessner, C. C.  
641 Harris, J. J. Hu, S. A. Ingles, W. Isaacs, E. M. John, W. H. L. Kao, B. Keating, R.  
642 A. Kittles, L. N. Kolonel, E. Larkin, L. Le Marchand, L. H. McNeill, R. C. Millikan,  
643 A. Murphy, S. Musani, C. Neslund-Dudas, S. Nyante, G. J. Papanicolaou, M. F.  
644 Press, B. M. Psaty, A. P. Reiner, S. S. Rich, J. L. Rodriguez-Gil, J. I. Rotter, B. A.  
645 Rybicki, A. G. Schwartz, L. B. Signorello, M. Spitz, S. S. Strom, M. J. Thun, M. A.

- 646 Tucker, Z. M. Wang, J. K. Wiencke, J. S. Witte, M. Wrensch, X. F. Wu, Y.  
647 Yamamura, K. A. Zanetti, W. Zheng, R. G. Ziegler, X. F. Zhu, S. Redline, J. N.  
648 Hirschhorn, B. E. Henderson, H. A. Taylor, A. L. Price, H. Hakonarson, S. J.  
649 Chanock, C. A. Haiman, J. G. Wilson, D. Reich, and S. R. Myers. 2011. The  
650 landscape of recombination in African Americans. *Nature* 476:170-U167.
- 651 Hunter, C. M., W. Huang, T. F. C. Mackay, and N. D. Singh. 2016a. The Genetic  
652 Architecture of Natural Variation in Recombination Rate in *Drosophila*  
653 *melanogaster*. *PLoS Genet.* 12.
- 654 Hunter, C. M., M. C. Robinson, D. L. Aylor, and N. D. Singh. 2016b. Genetic  
655 Background, Maternal Age, and Interaction Effects Mediate Rates of Crossing  
656 Over in *Drosophila melanogaster* Females. *G3-Genes Genom Genet* 6:1409-  
657 1416.
- 658 Hunter, C. M. and N. D. Singh. 2014. Do Males Matter? Testing the Effects of Male  
659 Genetic Background on Female Meiotic Crossover Rates in *Drosophila*  
660 *Melanogaster*. *Evolution* 68:2718-2726.
- 661 Hussin, J., M. H. Roy-Gagnon, R. Gendron, G. Andelfinger, and P. Awadalla. 2011.  
662 Age-Dependent Recombination Rates in Human Pedigrees. *PLoS Genet.*  
663 7:e1002251.
- 664 Jackson, S., D. M. Nielsen, and N. D. Singh. 2015. Increased exposure to acute thermal  
665 stress is associated with a non-linear increase in recombination frequency and  
666 an independent linear decrease in fitness in *Drosophila*. *BMC Evol. Biol.* 15.
- 667 Johnston, J. R. and R. Mortimer. 1967. Influence of Temperature on Recombination in  
668 Yeast. *Heredity* 22:297-&.
- 669 Johnston, S. E., C. Berenos, J. Slate, and J. M. Pemberton. 2016. Conserved Genetic  
670 Architecture Underlying Individual Recombination Rate Variation in a Wild  
671 Population of Soay Sheep (*Ovis aries*). *Genetics* 203:583-+.
- 672 Kidwell, M. G. 1972. Genetic change of recombination value in *Drosophila*  
673 *melanogaster* II. Simulated natural selection. *Genetics* 70:433-&.
- 674 Kong, A., J. Barnard, D. F. Gudbjartsson, G. Thorleifsson, G. Jonsdottir, S.  
675 Sigurdardottir, B. Richardsson, J. Jonsdottir, T. Thorgeirsson, M. L. Frigge, N. E.  
676 Lamb, S. Sherman, J. R. Gulcher, and K. Stefansson. 2004. Recombination rate  
677 and reproductive success in humans. *Nat. Genet.* 36:1203-1206.
- 678 Kong, A., G. Thorleifsson, D. F. Gudbjartsson, G. Masson, A. Sigurdsson, A.  
679 Jonsdottir, G. B. Walters, A. Gylfason, K. T. Kristinsson, S. A. Gudjonsson, M.  
680 L. Frigge, A. Helgason, U. Thorsteinsdottir, and K. Stefansson. 2010. Fine-scale  
681 recombination rate differences between sexes, populations and individuals.  
682 *Nature* 467:1099-1103.
- 683 Kong, A., G. Thorleifsson, H. Stefansson, G. Masson, A. Helgason, D. F. Gudbjartsson,  
684 G. M. Jonsdottir, S. A. Gudjonsson, S. Sverrisson, T. Thorlacius, A. Jonsdottir,  
685 G. A. Hardarson, S. T. Palsson, M. L. Frigge, J. R. Gulcher, U. Thorsteinsdottir,  
686 and K. Stefansson. 2008. Sequence variants in the RNF212 gene associate with  
687 genome-wide recombination rate. *Science* 319:1398-1401.
- 688 Korol, A. B. and K. G. Iliadi. 1994. Increased recombination frequencies resulting from  
689 directional selection for geotaxis in *Drosophila*. *Heredity* 72:64-68.
- 690 Lake, S. 1984. Variation in the recombination frequency and the relationship of maternal  
691 age in brood analysis of the distal and centromeric regions of the X-chromosome

- 692 in temperature shocked reciprocal hybrids of inbred lines of *Drosophila*  
693 *melanogaster* Hereditas 100:121-129.
- 694 Lindsley, D. L. and E. H. Grell. 1967. Genetic Variations of *Drosophila melanogaster*.  
695 Carnegie Inst. of Washington Pub. No. 627.
- 696 Lu, B. C. 1974. Genetic Recombination in Coprinus .4. Kinetic Study of Temperature  
697 Effect on Recombination Frequency. Genetics 78:661-677.
- 698 Luthardt, F. W., C. G. Palmer, and P. L. Yu. 1973. Chiasma and Univalent Frequencies  
699 in Aging Female Mice. Cytogenet. Cell Genet. 12:68-79.
- 700 Ma, L., J. R. O'Connell, P. M. VanRaden, B. T. Shen, A. Padhi, C. Y. Sun, D. M.  
701 Bickhart, J. B. Cole, D. J. Null, G. E. Liu, Y. Da, and G. R. Wiggans. 2015. Cattle  
702 Sex-Specific Recombination and Genetic Control from a Large Pedigree  
703 Analysis. PLoS Genet. 11.
- 704 McNelly-Ingles, C. A., B. C. Lamb, and L. C. Frost. 1966. Effect of Temperature on  
705 Recombination Frequency in Neurospora Crassa. Genet Res 7:169-+.
- 706 Modliszewski, J. L. and G. P. Copenhaver. 2017. Meiotic recombination gets stressed  
707 out: CO frequency is plastic under pressure. Curr. Opin. Plant Biol. 36:95-102.
- 708 Morgan, C. H., H. K. Zhang, and K. Bomblies. 2017. Are the effects of elevated  
709 temperature on meiotic recombination and thermotolerance linked via the axis  
710 and synaptonemal complex? Philos T R Soc B 372.
- 711 Neel, J. V. 1941. A relation between larval nutrition and the frequency of crossing over  
712 in the third chromosome of *Drosophila melanogaster*. Genetics 26:506-516.
- 713 Otto, S. P. and Y. Michalakis. 1998. The evolution of recombination in changing  
714 environments. Trends Ecol. Evol. 13:145-151.
- 715 Parsons, P. A. 1988. EVOLUTIONARY RATES - EFFECTS OF STRESS UPON  
716 RECOMBINATION. Biol. J. Linn. Soc. 35:49-68.
- 717 Pfennig, D. W., M. A. Wund, E. C. Snell-Rood, T. Cruickshank, C. D. Schlichting, and A.  
718 P. Moczek. 2010. Phenotypic plasticity's impacts on diversification and  
719 speciation. Trends Ecol. Evol. 25:459-467.
- 720 Plough, H. H. 1917. The effect of temperature on crossing over in *Drosophila*. Journal of  
721 Experimental Zoology 24:147-209.
- 722 Plough, H. H. 1921. Further studies on the effect of temperature on crossing over.  
723 Journal of Experimental Zoology 32:187-202.
- 724 Priest, N. K., D. A. Roach, and L. F. Galloway. 2007. Mating-induced recombination in  
725 fruit flies. Evolution 61:160-167.
- 726 Redfield, H. 1964. Regional association of crossing over in nonhomologous  
727 chromosomes in *Drosophila melanogaster* and its variation with age. Genetics  
728 49:319-342.
- 729 Rifaat, O. M. 1969. Crossing-over across Centromere in Mating-Type Chromosome of  
730 Neurospora Crassa. Genetica 40:89-&.
- 731 Rockman, M. V. and L. Kruglyak. 2009. Recombinational Landscape and Population  
732 Genomics of *Caenorhabditis elegans*. PLoS Genet. 5.
- 733 Rodell, C. F., M. R. Schipper, and D. K. Keenan. 2004. Modes of selection and  
734 recombination response in *Drosophila melanogaster*. J. Hered. 95:70-75.
- 735 Rose, A. M. and D. L. Baillie. 1979. Effect of Temperature and Parental Age on  
736 Recombination and Nondisjunction in *Caenorhabditis-Elegans*. Genetics 92:409-  
737 418.



- 738 Rybnikov, S. R., Z. M. Frenkel, and A. B. Korol. 2017. What drives the evolution of  
739 condition-dependent recombination in diploids? Some insights from simulation  
740 modelling. *Philos T R Soc B* 372.
- 741 Sandor, C., W. Li, W. Coppieters, T. Druet, C. Charlier, and M. Georges. 2012. Genetic  
742 Variants in REC8, RNF212, and PRDM9 Influence Male Recombination in Cattle.  
743 *PLoS Genet.* 8.
- 744 Sarkar, S. 2004. From the Reaktionsnorm to the evolution of adaptive plasticity. Pp. 10-  
745 31 in T. J. DeWitt, and S. M. Scheiner, eds. *Phenotypic plasticity: Functional and*  
746 *conceptual approaches.* Oxford University Press, New York.
- 747 Shaw, D. D. 1972. Genetic and Environmental Components of Chiasma Control .2.  
748 Response to Selection in *Schistocerca*. *Chromosoma* 37:297-&.
- 749 Singh, N. D., D. R. Criscoe, S. Skolfield, K. P. Kohl, E. S. Keebaugh, and T. A.  
750 Schlenke. 2015. Fruit flies diversify their offspring in response to parasite  
751 infection. *Science* 349:747-750.
- 752 Smith, H. F. 1936. Influence of temperature on crossing-over in *Drosophila*. *Nature*  
753 138:329-330.
- 754 Stern, C. 1926. An effect of temperature and age on crossing over in the first  
755 chromosome of *Drosophila melanogaster*. *Proceedings of the National Academy*  
756 *of Sciences of the United States of America* 12:530-532.
- 757 Tedman-Aucoin, K. and A. F. Agrawal. 2012. The Effect of deleterious mutations and  
758 age on recombination in *Drosophila melanogaster*. *Evolution* 66:575-585.
- 759 Valentin, J. 1973. Heritability of Recombination Frequency - Observations on Statistical  
760 Complications and Report on Small-Scale Tests in *Drosophila*. *Hereditas* 75:1-4.
- 761 Via, S., R. Gomulkiewicz, G. Dejong, S. M. Scheiner, C. D. Schlichting, and P. H.  
762 Vantienderen. 1995. Adaptive Phenotypic Plasticity - Consensus and  
763 Controversy. *Trends Ecol. Evol.* 10:212-217.
- 764 West-Eberhard, M. J. 2003. Developmental plasticity and evolution.
- 765 Yeaman, S., Y. K. Chen, and M. C. Whitlock. 2010. No effect of environmental  
766 heterogeneity on the maintenance of genetic variation in Wing Shape in  
767 *Drosophila melanogaster*. *Evolution* 64:3398-3408.
- 768 Zhuchenko, A. A., A. B. Korol, and L. P. Kovtyukh. 1985. Change of the crossing-over  
769 frequency in *Drosophila* during selection for resistance to temperature  
770 fluctuations *Genetica* 67:73-78.  
771  
772

773 **Table 1:** Number of replicate lines assayed in each population at each temperature  
774

| Population   | 16°C       | 25°C       |
|--------------|------------|------------|
| C1           | 14         | 14         |
| C2           | 8          | 8          |
| C3           | 13         | 13         |
| C4           | 10         | 10         |
| C5           | 12         | 13         |
| H1           | 11         | 11         |
| H2           | 9          | 9          |
| H3           | 12         | 12         |
| H4           | 10         | 9          |
| H5           | 9          | 9          |
| T1           | 9          | 9          |
| T2           | 11         | 11         |
| T3           | 9          | 9          |
| T4           | 10         | 10         |
| T5           | 12         | 12         |
| <b>TOTAL</b> | <b>159</b> | <b>158</b> |

775  
776  
777

778 **Table 2: Effect Tests for Logistic Regression on Recombination Fraction**

| Source               | df  | $\chi^2$ | Prob > $\chi^2$    |
|----------------------|-----|----------|--------------------|
| Line                 | 145 | 1226     | <b>&lt; 0.0001</b> |
| Regime               | 2   | 111      | <b>&lt; 0.0001</b> |
| Population           | 12  | 149      | <b>&lt; 0.0001</b> |
| Temperature          | 1   | 5.4      | <b>0.020</b>       |
| Regime x Temperature | 2   | 0.21     | 0.90               |

779

780



781 **Table 3:** Effect Tests for Model Fitting of Change in Recombination Fraction between  
782 25°C and 16°C

| Source     | df  | Sum of Squares | F Ratio | Prob > F |
|------------|-----|----------------|---------|----------|
| Line       | 144 | 0.69           | 1.14    | 0.16     |
| Regime     | 2   | 0.009          | 0.54    | 0.29     |
| Population | 12  | 0.06           | 1.19    | 0.90     |

783

784

785 **Figure Legends:**

786

787 **Figure 1:** Average recombination fraction for each of the experimental evolution  
788 regimes at 16°C and 25°C. To obtain the regime average, the mean recombination  
789 fraction for each line was determined by averaging across replicates. The mean  
790 population recombination fraction was estimated by averaging across the average  
791 estimates for all of the lines in that population. The mean regime recombination fraction  
792 was estimated as the average across the five replicate populations. The standard error  
793 of the estimate across replicate populations is also shown for each regime at each  
794 temperature.

795

796 **Figure 2:** The average change in recombination fraction ( $\Delta$ RF) between 25°C and 16°C  
797 for each experimental regime. The average change for each treatment was calculated  
798 as follows. The mean change for each line was estimated as the difference between the  
799 average recombination fraction across replicates at 25°C and the average  
800 recombination fraction across replicates at 16°C. The mean change for each population  
801 was then estimated as the average  $\Delta$ RF across all lines in that population. Finally, we  
802 estimate average  $\Delta$ RF for an evolution regime as the average across the five replicate  
803 populations. The standard error of that estimate across replicate populations is also  
804 shown for each regime.

805

806 Figure 1  
807

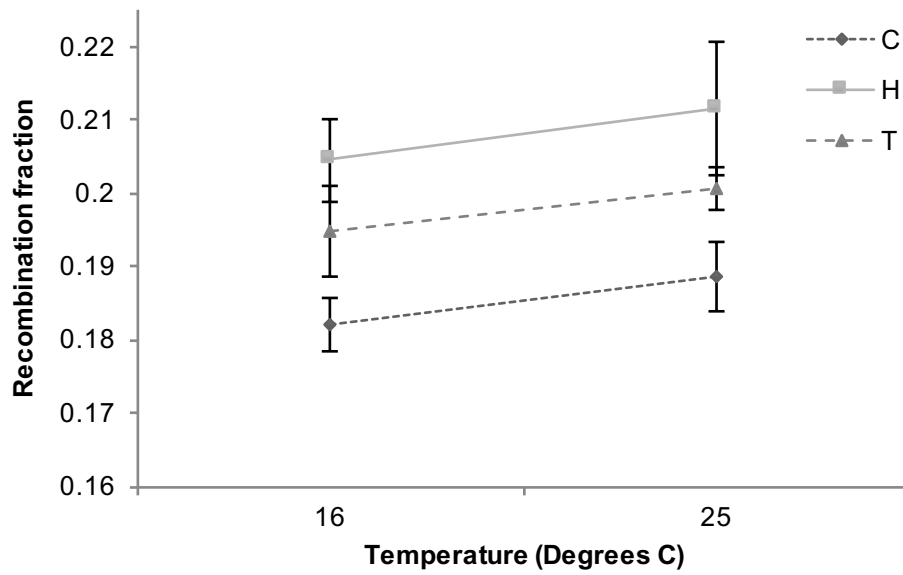

808  
809  
810

811 Figure 2  
812

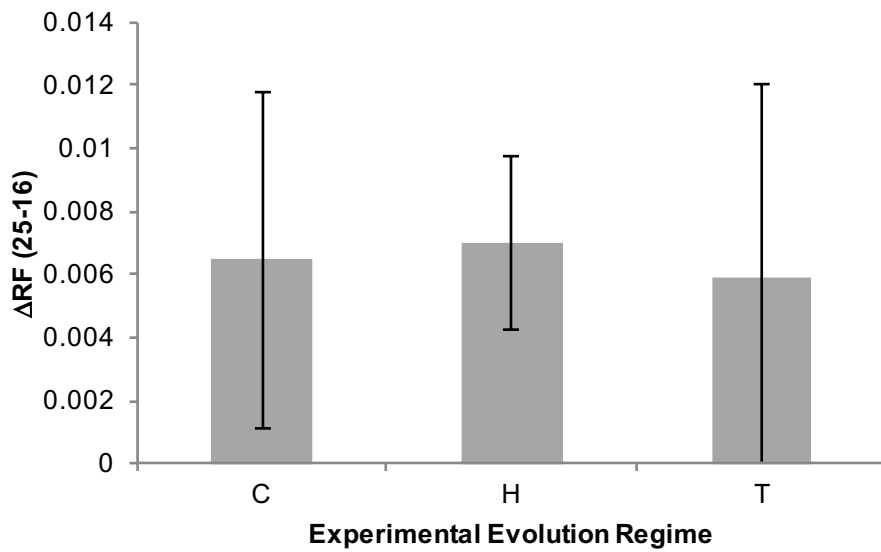

813  
814  
815

816 Supplemental Figure 1: Distributions of ratios of a) males/females, b) wild-type/ *e ro*  
817 flies, and c) *e + / + ro* flies at 16 degrees (dark grey) and 25 degrees (light grey) C.  
818 a)

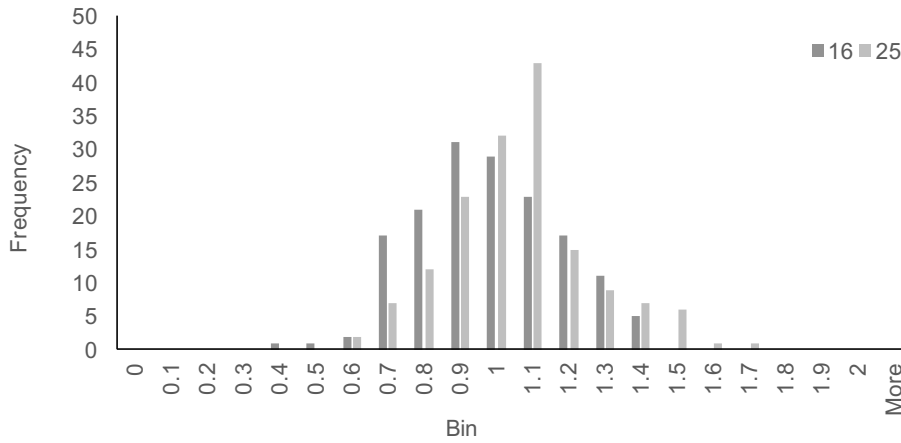

819 b)  
820

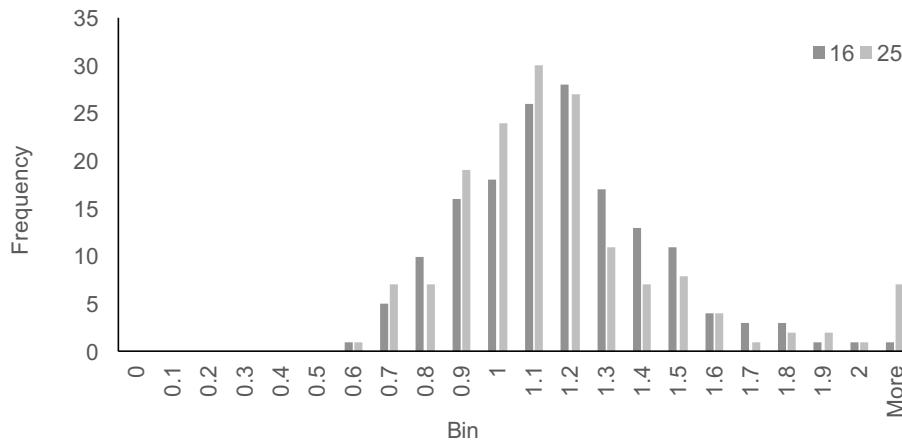

821 c)

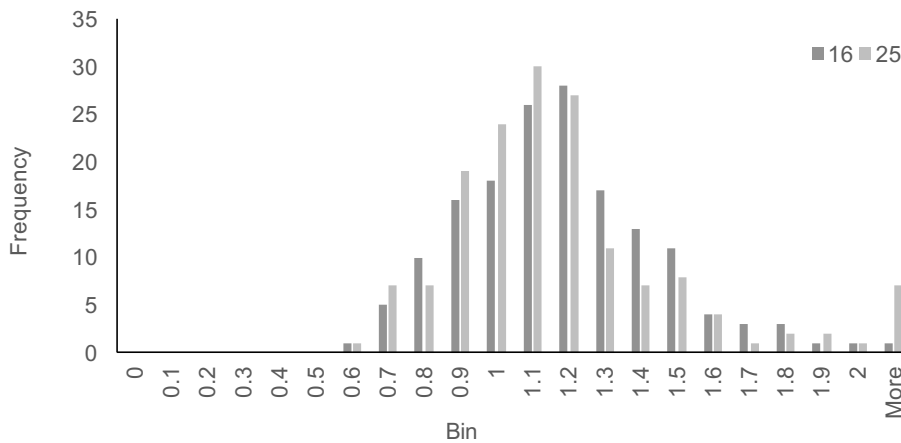

822
